# Supplementary material for: Impact of Nutrition Education on the Compliance with Model Food Ration in 231 Preschools, Poland: Results of Eating Healthy, Growing Healthy Program
Source: Nutrients. 2018 Oct 4;10(10):1427. doi: 10.3390/nu10101427 (PMC6213417; doi:10.3390/nu10101427)
Supplement: Supplementary file 1 [file nutrients-10-01427-s001.pdf]

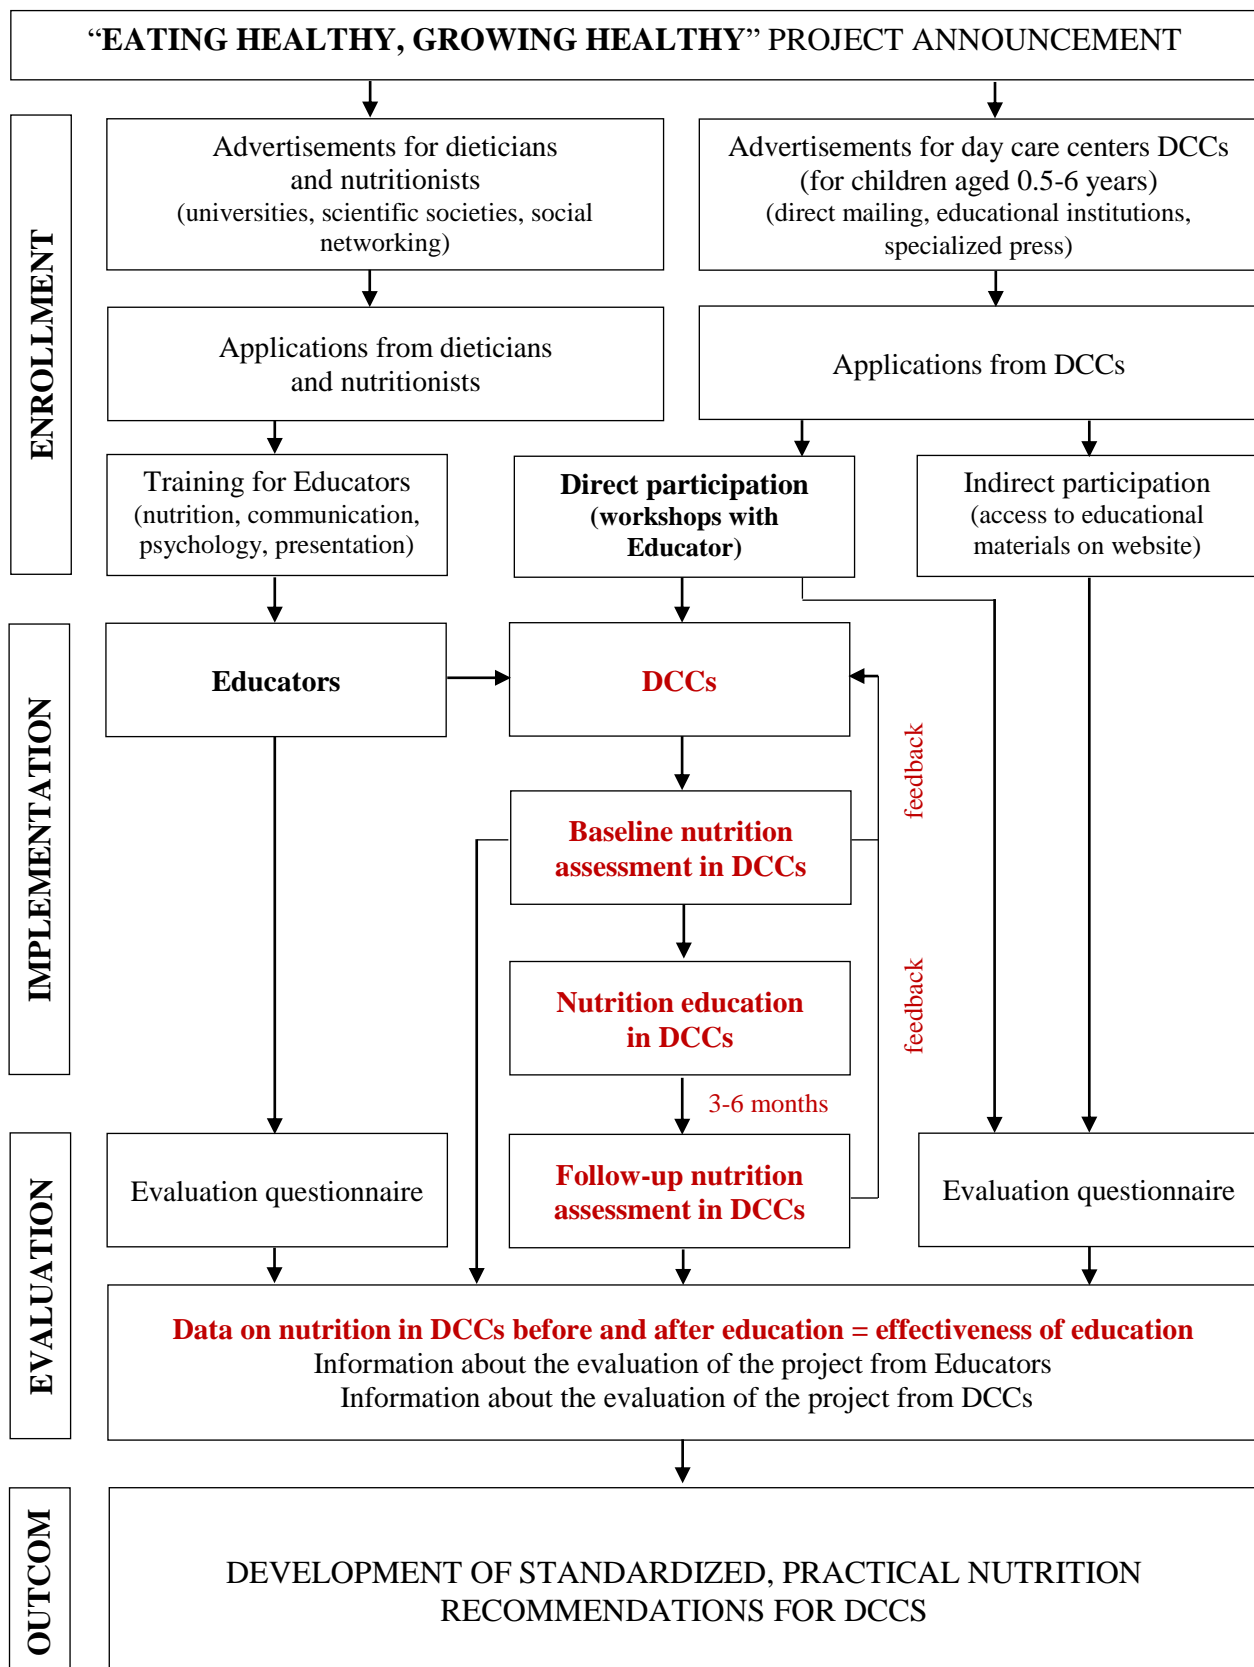

Figure S1. The framework of the program The Eating Healthy, Growing Healthy (the activities included in the current study are marked in red).

Table S1. The curriculum of education program for staff involved in planning the menus, ordering food products and preparing meals in DCCs

---

**Topics of lectures (Power Point presentations) and workshops:**

---

1. General recommendations of balanced nutrition
  2. Water and its role in children diet
  3. Sugar in children diet
  4. How to deal with food allergies?
  5. Fussy eater or food neophobic?
  6. Strong bones and teeth—the role of vitamin D and calcium
  7. Salt in children diet
  8. Attractive presentation of the meals
  9. Plump, overweight, obese—how to recognize the problem?
  10. Limits of child's choice
  11. How to involve kids in cooking?
  12. Servings size: self-eating, self-deciding
-

Figure S2. The example of a daily inventory report

Preschool XX  
City Poznan

**Daily Inventory Report** Nr : 66 z dnia 07-04-2015

Alimentation details

| Group        | Breakfast | II breakfast | Lunch     | Total      |
|--------------|-----------|--------------|-----------|------------|
| Children     | 45        | 45           | 45        | 135        |
| Personel     |           |              | 1         | 1          |
| <b>Total</b> | <b>45</b> | <b>45</b>    | <b>46</b> | <b>136</b> |

Menu

| Lp.                               | Meal         | Menu                                                                                                       | Cost of 1 meal | Kcal / meal |
|-----------------------------------|--------------|------------------------------------------------------------------------------------------------------------|----------------|-------------|
| 1                                 | Breakfast    | Tea with lemon, whole grain and regular bread with butter, rabbit patte, cucumber, apple                   | 1,68           | 0,00        |
| 2                                 | II breakfast | Fruit tea, pudding with raspberries, orange juice                                                          | 1,86           | 0,00        |
| 3                                 | Lunch        | Cabbage soup with parsley, fried egg, potatoes, carrot with green peas, sour cucumber, multi-fruit compote | 2,35           | 0,00        |
| <b>Full board cost per person</b> |              |                                                                                                            | <b>5,89</b>    | <b>0,00</b> |

Products taken from the warehouse

Breakfast

| Lp.            | Product          | Product / description | Unit | Unit cost | Quantity | Cost         |
|----------------|------------------|-----------------------|------|-----------|----------|--------------|
| 1              | chleb razowy     | Whole grain bread     | Item | 4,40      | 1,00     | 4,40         |
| 2              | chleb zwykly     | Regular bread         | Item | 2,50      | 2,00     | 5,00         |
| 3              | cukier           | Sugar                 | KG   | 2,90      | 1,50     | 4,35         |
| 4              | cytryna          | Lemon                 | KG   | 5,90      | 0,30     | 1,77         |
| 5              | herbata          | Tea                   | Item | 1,90      | 0,50     | 0,95         |
| 6              | jablka           | Apple                 | KG   | 2,90      | 3,00     | 8,70         |
| 7              | maslo            | Butter                | Item | 4,70      | 2,00     | 9,40         |
| 8              | ogorek zielony   | Cucumber              | KG   | 7,00      | 0,50     | 3,50         |
| 9              | paszтет z królka | Rabbit pate           | KG   | 39,98     | 0,94     | 37,58        |
| Total per meal |                  |                       |      |           |          | <b>75,65</b> |

II breakfast

| Lp.            | Product          | Product / description | Unit  | Unit cost | Quantity | Cost         |
|----------------|------------------|-----------------------|-------|-----------|----------|--------------|
| 10             | budyń            | Instant pudding       | Item  | 1,25      | 5,00     | 6,25         |
| 11             | budyń            | Instant pudding       | Item  | 1,25      | 11,00    | 13,75        |
| 12             | herbata owocowa  | Fruit tea             | Item  | 3,50      | 1,00     | 3,50         |
| 13             | malina mrożona   | Frozen raspberry      | KG    | 16,38     | 1,20     | 19,66        |
| 14             | mleko            | Milk                  | litre | 2,62      | 8,00     | 20,96        |
| 15             | sok pomarańczowy | Orange juice          | Item  | 6,50      | 3,00     | 19,50        |
| Total per meal |                  |                       |       |           |          | <b>83,62</b> |

Lunch

| Lp. | Product               | Product / description | Unit | Unit cost | Quantity | Cost  |
|-----|-----------------------|-----------------------|------|-----------|----------|-------|
| 16  | jaja                  | Eggs                  | Item | 0,75      | 15,00    | 11,25 |
| 17  | jaja                  | Eggs                  | Item | 0,70      | 31,00    | 21,70 |
| 18  | kapusta kwaszona      | Sauerkraft            | KG   | 6,00      | 1,00     | 6,00  |
| 19  | koper                 | Fennel                | Item | 1,50      | 2,00     | 3,00  |
| 20  | marchewka z groszkien | Carrots with peas     | KG   | 4,62      | 2,10     | 9,70  |

| Lp.                 | Product             | Product / description | Unit    | Unit cost | Quantity | Cost   |
|---------------------|---------------------|-----------------------|---------|-----------|----------|--------|
| 21                  | masło               | Butter                | Item    | 4,70      | 1,50     | 7,05   |
| 22                  | mieszanka kompotowa | Compote mixed fruit   | KG      | 7,66      | 0,90     | 6,89   |
| 23                  | ogórek kwaszony     | Sour cucumber         | package | 5,00      | 2,00     | 10,00  |
| 24                  | pietruszka zielona  | Green parsley         | Item    | 1,50      | 1,00     | 1,50   |
| 25                  | włoszczyzna         | Mix of vegetables     | KG      | 4,33      | 1,20     | 5,20   |
| 26                  | ziemniaki           | Potatoes              | KG      | 1,30      | 7,00     | 9,10   |
| 27                  | ziemniaki           | Potatoes              | KG      | 1,30      | 7,00     | 9,10   |
| 28                  | łopatka b/k         | Boneless pork meat    | KG      | 18,90     | 0,19     | 3,59   |
| 29                  | łopatka b/k         | Boneless pork meat    | KG      | 18,90     | 0,21     | 3,97   |
| Total per meal      |                     |                       |         |           |          | 108,05 |
| Total meal together |                     |                       |         |           |          | 267,32 |

Average cost of full board 5,81

Average cost of 1 meal 1,97

Prepared .....

Approved .....

Released .....

Received .....
